# Supplementary material
Source: publisher site journal article supplement (https://www.dovepress.com/article/86440)
Supplement: Supplementary file 1 [file get_supplementary_file.php]

# Antimicrobial activity of bone cements embedded with organic nanoparticles

by

Stefano Perni <sup>1,2</sup>, Victorien Thenault <sup>1</sup>, Pauline Abdo <sup>1</sup>, Katrin Margulis <sup>3</sup>, Shlomo Magdassi

<sup>3</sup>, Polina Prokopovich <sup>1,2\*</sup>

<sup>1</sup> School of Pharmacy and Pharmaceutical Sciences, Cardiff University, Cardiff, UK

<sup>2</sup> Center for Biomedical Engineering, Massachusetts Institute of Technology, Cambridge, MA 02139,  
USA

<sup>3</sup> Casali Institute, Institute of Chemistry, the Center for Nanoscience and Nanotechnology, the Hebrew  
University of Jerusalem, Jerusalem, Israel

**Supplementary material**

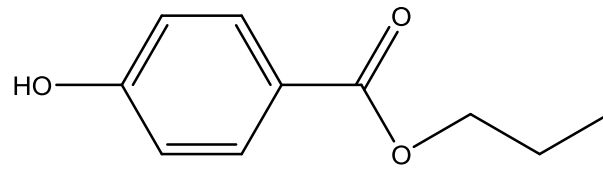

Figure S1. Chemical structure of parabens

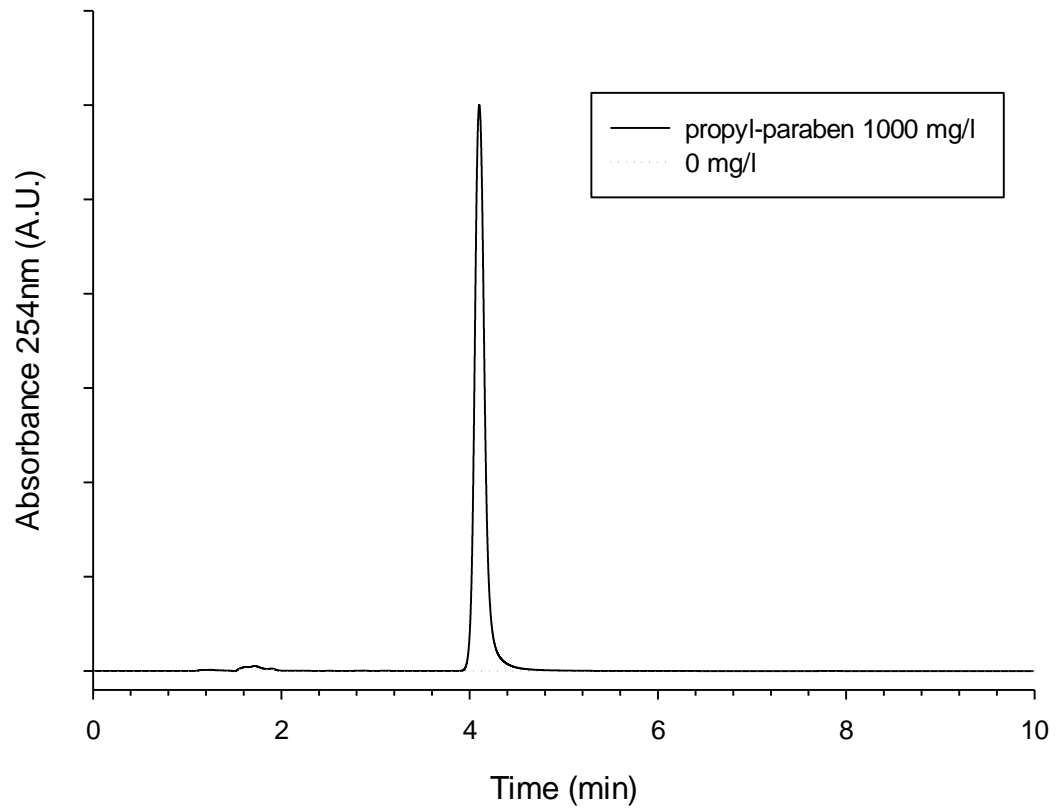

Figure S2. Chromatogram of a propyl-paraben solution 1 mg/ml and pure solvent

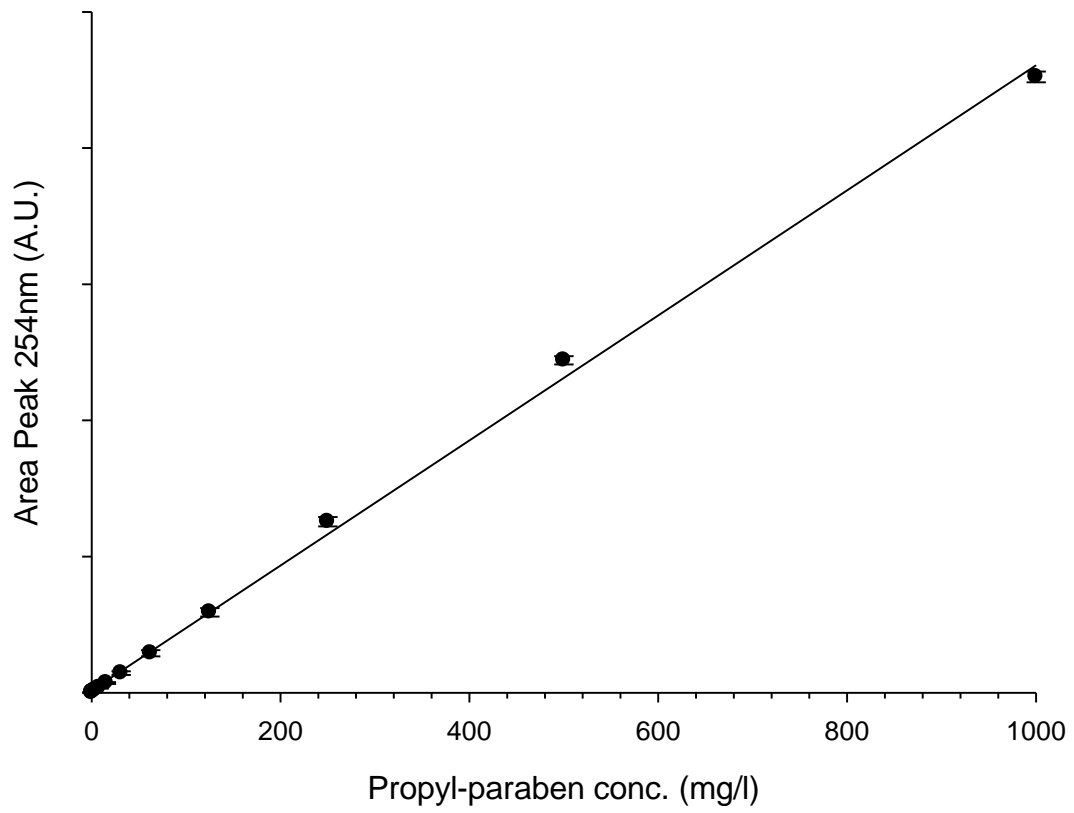

Figure S3. Calibration curve of concentration of propyl-paraben and peak area.

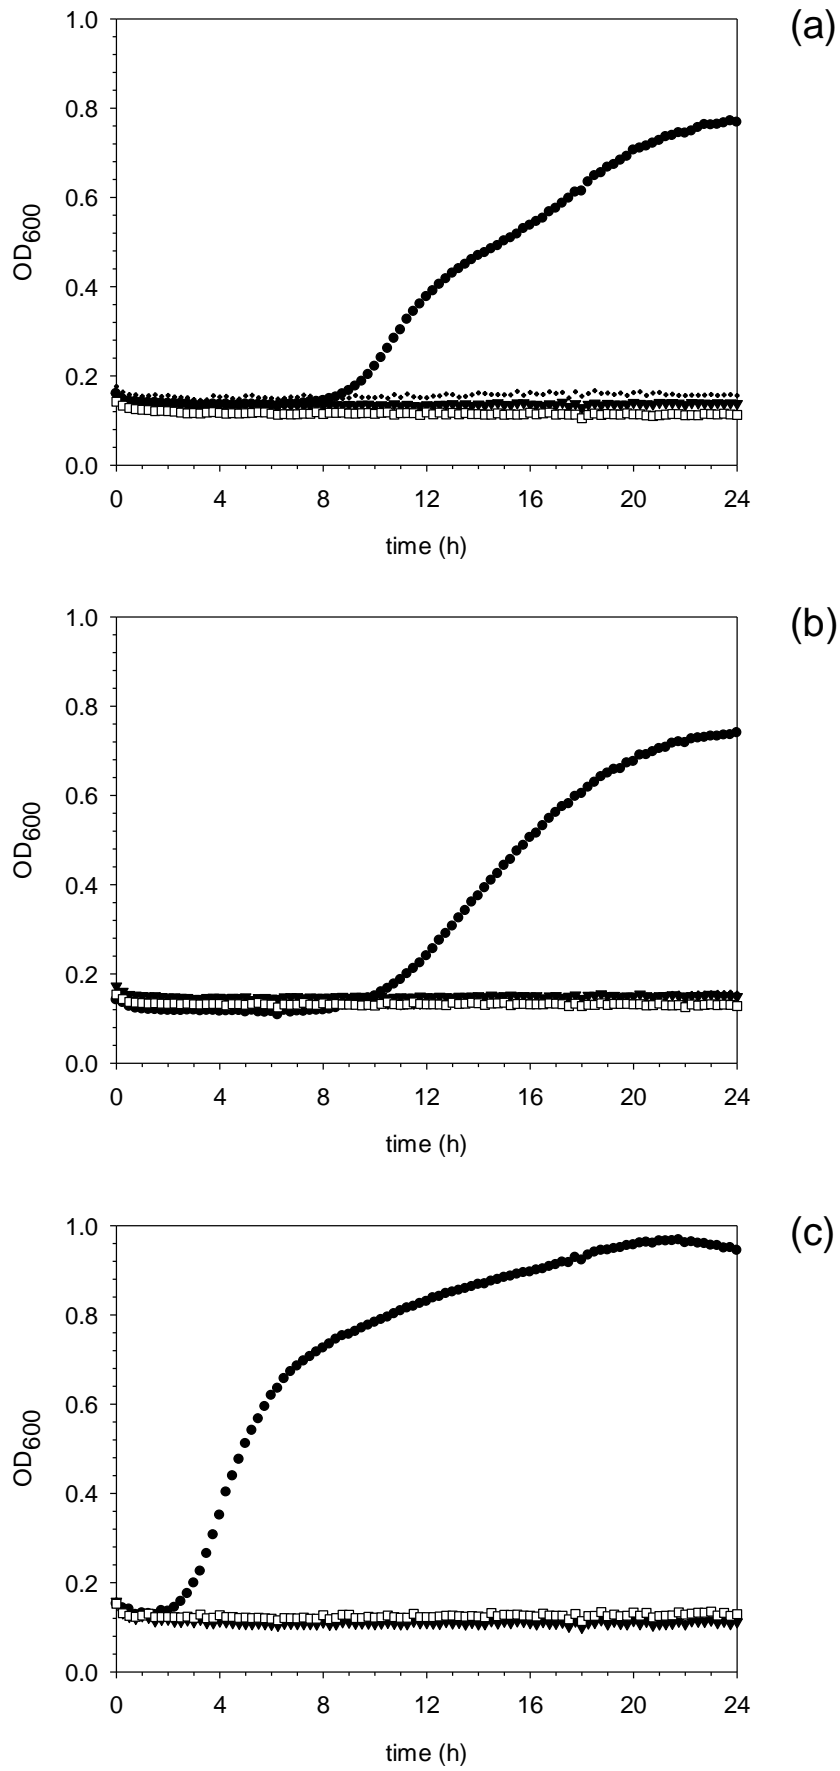

Figure S4. Examples of growth curves on (a) Brushite, (b) Hydroxyapatite and (c) PMMA containing gentamicin 2% w/w. ● *S. epidermidis* ▼ MRSA □ *S. aureus* \* *A. baumannii*
